# Supplementary material for: Effects of exercise-based cardiac rehabilitation delivery modes on exercise capacity and health-related quality of life in heart failure: a systematic review and network meta-analysis
Source: HighWire-hosted journal article supplement (doi:10.1136/openhrt-2021-001949), 2022-06-01
Supplement: openhrt-2021-001949supp001_data_supplement.pdf [file openhrt-2021-001949supp001_data_supplement.pdf]

Supplementary data belonging to:

## **Effects of exercise-based cardiac rehabilitation delivery modes on exercise capacity and health-related quality of life in heart failure: a systematic review and network meta-analysis**

Teketo Kassaw Tegegne, Jonathan Charles Rawstorn, Rebecca Amy Nourse, Kelemu Tilahun Kibret, Kedir Yimam Ahmed, Ralph Maddison

### **Abbreviations:**

6MWD – Six-minute walk distance, ISWD – Incremental shuttle walk distance, VO<sub>2</sub>peak – Peak oxygen uptake, MLHFQ – Minnesota Living with Heart Failure Questionnaire, SF-36 MCS – Short Form Survey 36 mental component score, SF-36 PCS – Short Form Survey 36 physical component score, KCCQ – Kansas City Cardiomyopathy Questionnaire, HF – Heart failure

## Supplement 1 Characteristics of the included studies

| Study                            | Country of study     | Exercise program | Follow-up        | Sample size | ExCR delivery | NYHA class    | HF type      |
|----------------------------------|----------------------|------------------|------------------|-------------|---------------|---------------|--------------|
|                                  |                      | duration (weeks) | duration (weeks) |             | modes         |               |              |
| Ajiboye 2015 <sup>87</sup>       | Nigeria              | 12               | 12               | 51          | CB, UC        | NYHA II - III | Not reported |
| Aksoy 2015 <sup>88</sup>         | Turkey               | 10               | 10               | 45          | CB, UC        | NYHA II - III | Not reported |
| Andryukhin 2010 <sup>146</sup>   | Russia               | 24               | 24               | 85          | HB, UC        | NYHA I - III  | HFpEF        |
| Austin 2005 <sup>133</sup>       | UK                   | 24               | 24               | 200         | CB, UC        | NYHA II - III | Not reported |
| Azhar 2020 <sup>161</sup>        | USA                  | 12               | 12               | 11          | CB, UC        | NYHA II - III | HFpEF        |
| Barrow 2007 <sup>131</sup>       | UK                   | 16               | 16               | 65          | CB, UC        | NYHA II - III | Not reported |
| Beckers 2010 <sup>162</sup>      | Netherlands          | 12               | 52               | 53          | HB, CB, UC    | NYHA II - III | Not reported |
| Belardinelli 1999 <sup>145</sup> | Italy                | 60               | 60               | 99          | CB, UC        | NYHA I - IV   | Not reported |
| Belardinelli 2005 <sup>91</sup>  | Italy                | 8                | 8                | 59          | CB, UC        | NYHA II - III | Not reported |
| Belardinelli 2006 <sup>89</sup>  | Italy                | 8                | 78               | 52          | CB, UC        | NYHA II - III | Not reported |
| Belardinelli 2012 <sup>90</sup>  | Italy                | 520              | 520              | 123         | CB, UC        | NYHA II - III | Not reported |
| Bernocchi 2018 <sup>152</sup>    | Italy                | 16               | 26               | 112         | HB, UC        | NYHA II - IV  | Not reported |
| Blumenthal 2012 <sup>140</sup>   | USA, Canada & France | 12               | 208              | 2,322       | CB, UC        | NYHA I - IV   | Not reported |
| Borland 2014 <sup>30</sup>       | Sweden               | 12               | 12               | 48          | UC, HB        | NYHA II - III | Not reported |
| Brubaker 2009 <sup>142</sup>     | USA                  | 16               | 16               | 59          | CB, UC        | NYHA II - III | HFrEF        |
| Brubaker 2020 <sup>28</sup>      | USA                  | 16               | 16               | 116         | UC, CB        | NYHA II - III | HFrEF        |
| Butterfield 2008 <sup>92</sup>   | Australia            | 12               | 12               | 19          | HB, UC        | Not reported  | Not reported |
| Chen 2018c <sup>93</sup>         | China                | 24               | 24               | 62          | CB, UC        | NYHA II - IV  | Not reported |

| Study                             | Country of study | Exercise program | Follow-up        | Sample size | ExCR delivery | NYHA class    | HF type      |
|-----------------------------------|------------------|------------------|------------------|-------------|---------------|---------------|--------------|
|                                   |                  | duration (weeks) | duration (weeks) |             | modes         |               |              |
| Chen 2018t <sup>94</sup>          | Taiwan           | 12               | 12               | 37          | HB, UC        | NYHA I - III  | HFrEF        |
| Chen 2018ta <sup>135</sup>        | Taiwan           | 12               | 12               | 80          | HB, UC        | NYHA I - II   | Not reported |
| Chien 2011 <sup>95</sup>          | Taiwan           | 8                | 8                | 51          | HB, UC        | NYHA I - III  | Not reported |
| Chou 2019 <sup>96</sup>           | Taiwan           | 12               | 12               | 34          | CB, UC        | NYHA II - III | Not reported |
| Cider 2003 <sup>138</sup>         | Sweden           | 8                | 8                | 25          | CB, UC        | NYHA II - III | Not reported |
| Corvera-Tindel 2004 <sup>97</sup> | USA              | 12               | 12               | 79          | HB, UC        | NYHA II - IV  | Not reported |
| Dalal 2019 <sup>98</sup>          | UK               | 12               | 52               | 216         | HB, UC        | NYHA I - III  | HFrEF        |
| Daskapan 2005 <sup>99</sup>       | Turkey           | 12               | 12               | 22          | HB, CB        | NYHA II - III | Not reported |
| Davidson 2010 <sup>141</sup>      | Australia        | 12               | 12               | 105         | HY, UC        | NYHA I - III  | Not reported |
| deMeirelles 2014 <sup>137</sup>   | Brazil           | 24               | 26               | 30          | CB, UC        | NYHA II - III | Not reported |
| deMelloFranco 2006 <sup>63</sup>  | Brazil           | 16               | 16               | 29          | CB, UC        | NYHA II - III | Not reported |
| Dracup 2007 <sup>67</sup>         | USA              | 52               | 52               | 173         | HB, UC        | NYHA II - IV  | Not reported |
| Du 2018 <sup>57</sup>             | Australia        | 24               | 26               | 132         | HB, UC        | NYHA II - III | Not reported |
| Dubach 1997 <sup>66</sup>         | Switzerland      | 8                | 8                | 25          | CB, UC        | NYHA II - III | Not reported |
| Dziekan 1998 <sup>65</sup>        | Switzerland      | 8                | 8                | 20          | CB, UC        | NYHA II - III | Not reported |
| Edelmann 2011 <sup>74</sup>       | Germany          | 12               | 12               | 64          | CB, UC        | NYHA II - III | HFpEF        |
| Ellis 2020 <sup>100</sup>         | Australia        | 8                | 8                | 47          | CB, UC        | NYHA I - III  | Not reported |
| Erbs 2010 <sup>62</sup>           | Germany          | 12               | 12               | 37          | HB, UC        | NYHA III      | Not reported |
| Evangelista 2006 <sup>69</sup>    | USA              | 24               | 26               | 99          | HB, UC        | NYHA II - IV  | Not reported |
| Evans 2010 <sup>71</sup>          | UK               | 7                | 7                | 57          | HB, UC        | NYHA II - IV  | Not reported |

| Study                                  | Country of study           | Exercise program | Follow-up        | Sample size | ExCR delivery | NYHA class    | HF type       |
|----------------------------------------|----------------------------|------------------|------------------|-------------|---------------|---------------|---------------|
|                                        |                            | duration (weeks) | duration (weeks) |             | modes         |               |               |
| Flynn 2009 <sup>155</sup>              | USA, Canada & France       | 12               | 208              | 2,331       | CB, UC        | NYHA I - IV   | Not reported  |
| Fraga 2007 <sup>147</sup>              | Brazil                     | 16               | 16               | 27          | CB, UC        | NYHA II - III | Not reported  |
| Fu 2013 <sup>101</sup>                 | Taiwan                     | 12               | 12               | 45          | CB, UC        | NYHA II - III | Not reported  |
| Gary 2004 <sup>44</sup>                | USA                        | 12               | 12               | 32          | HB, UC        | NYHA II - III | Not reported  |
| Gary 2007 <sup>68</sup>                | USA                        | 12               | 12               | 23          | HB, UC        | NYHA II - III | Not reported  |
| Gary 2010 <sup>136</sup>               | USA                        | 12               | 24               | 37          | HB, UC        | NYHA II - III | Not reported  |
| Gary 2012 <sup>157</sup>               | USA                        | 12               | 12               | 24          | HB, UC        | NYHA II - III | Not reported  |
| Giannuzzi 2003 <sup>144</sup>          | Italy                      | 24               | 26               | 90          | HB, UC        | NYHA II - III | Not reported  |
| Gielen 2003 <sup>102</sup>             | Switzerland                | 24               | 26               | 20          | HB, UC        | NYHA II - III | Not reported  |
| Glowczynska 2021 <sup>154</sup>        | Poland                     | 9                | 9                | 782         | TE, UC        | NYHA I - III  | Not reported  |
| Guazzi 2004 <sup>36</sup>              | Italy                      | 8                | 16               | 31          | CB, UC        | NYHA I - III  | Not reported  |
| Hambrecht 2000 <sup>39</sup>           | Germany                    | 24               | 26               | 73          | HB, UC        | NYHA I - III  | Not reported  |
| Hambrecht 2005 <sup>37</sup>           | Germany                    | 24               | 26               | 18          | HB, UC        | NYHA II - III | Not reported  |
| Hasanpour-Dehkordi 2020 <sup>165</sup> | Iran                       | 24               | 24               | 52          | CB, UC        | NYHA II - III | Not reported  |
| Hollriegel 2016 <sup>53</sup>          | Germany                    | 52               | 52               | 37          | HB, UC        | NYHA III      | Not reported  |
| Hwang 2017 <sup>38</sup>               | Australia                  | 12               | 24               | 53          | CB, TE        | NYHA I - III  | HFpEF & HFrEF |
| Jaarsma 2021 <sup>128</sup>            | Sweden, Italy, Israel,     | 12               | 52               | 605         | HB, UC        | NYHA I - IV   | Not reported  |
|                                        | Netherlands, Germany & USA |                  |                  |             |               |               |               |
| Jolly 2009 <sup>134</sup>              | UK                         | 24               | 52               | 169         | HB, UC        | NYHA I - III  | Not reported  |
| Jones 2014 <sup>132</sup>              | USA, Canada & France       | 12               | 208              | 90          | CB, UC        | NYHA I - IV   | Not reported  |

| Study                                | Country of study | Exercise program | Follow-up        | Sample size | ExCR delivery | NYHA class    | HF type      |
|--------------------------------------|------------------|------------------|------------------|-------------|---------------|---------------|--------------|
|                                      |                  | duration (weeks) | duration (weeks) |             | modes         |               |              |
| Jonsdottir 2006 <sup>47</sup>        | Iceland          | 20               | 52               | 43          | CB, UC        | NYHA II - III | Not reported |
| Kaltsatou 2014 <sup>103</sup>        | Greek            | 32               | 34               | 51          | CB, UC        | NYHA II - III | Not reported |
| Karapolat 2009 <sup>70</sup>         | Turkey           | 8                | 8                | 68          | HB, CB        | NYHA II - III | Not reported |
| Keteyian 1996 <sup>35</sup>          | USA              | 24               | 24               | 29          | CB, UC        | NYHA II - III | Not reported |
| Kiilavuori 1999 <sup>81</sup>        | Finland          | 24               | 26               | 27          | HY, UC        | NYHA II - III | Not reported |
| Kitzman 2010 <sup>41</sup>           | USA              | 16               | 16               | 53          | CB, UC        | NYHA II - III | HFpEF        |
| Kitzman 2013 <sup>40</sup>           | USA              | 16               | 16               | 63          | CB, UC        | NYHA II - III | HFpEF        |
| Kitzman 2016 <sup>43</sup>           | USA              | 20               | 20               | 100         | CB, UC        | NYHA II - III | HFpEF        |
| Kitzman 2021 <sup>42</sup>           | USA              | 12               | 26               | 349         | CB, UC        | NYHA II - IV  | Not reported |
| Klecha 2007 <sup>82</sup>            | Poland           | 24               | 26               | 50          | CB, UC        | NYHA II - III | Not reported |
| Klocek 2005 <sup>85</sup>            | Poland           | 24               | 26               | 42          | CB, UC        | NYHA II - III | Not reported |
| Koukouvou 2004 <sup>79</sup>         | Greek            | 24               | 26               | 26          | CB, UC        | NYHA II - III | Not reported |
| Kulcu 2007 <sup>75</sup>             | Turkey           | 8                | 8                | 44          | CB, UC        | NYHA II - III | Not reported |
| Lang 2018 <sup>159</sup>             | UK               | 12               | 26               | 50          | HB, UC        | NYHA II - III | HFpEF        |
| Lans 2018 <sup>150</sup>             | Sweden           | 12               | 52               | 22          | HB, CB        | NYHA II - III | Not reported |
| Maiorana 2011 <sup>34</sup>          | Australia        | 12               | 12               | 36          | CB, UC        | NYHA I - III  | Not reported |
| Maldonado-Martin 2017 <sup>130</sup> | USA              | 16               | 16               | 47          | CB, UC        | NYHA II - III | HFpEF        |
| Mandic 2009 <sup>104</sup>           | Canada           | 12               | 12               | 42          | CB, UC        | NYHA I - III  | Not reported |
| McKelvie 2002 <sup>60</sup>          | Canada           | 52               | 52               | 181         | HB, UC        | NYHA I - III  | Not reported |
| Mezzani 2013 <sup>105</sup>          | Italy            | 12               | 12               | 30          | HB, UC        | NYHA II - III | Not reported |

| Study                          | Country of study          | Exercise program<br>duration (weeks) | Follow-up<br>duration (weeks) | Sample size | ExCR delivery<br>modes | NYHA class      | HF type       |
|--------------------------------|---------------------------|--------------------------------------|-------------------------------|-------------|------------------------|-----------------|---------------|
| Mudge 2018 <sup>31</sup>       | Australia                 | 12                                   | 52                            | 278         | HB, HY                 | NYHA I - IV     | HFpEF & HFrEF |
| Mueller 2007 <sup>106</sup>    | Switzerland               | 4                                    | 322                           | 50          | CB, UC                 | Not<br>reported | Not reported  |
| Mueller 2021 <sup>56</sup>     | Germany, Belgium & Norway | 52                                   | 52                            | 176         | TE, UC                 | NYHA II - III   | HFpEF         |
| Muller 2009 <sup>107</sup>     | Switzerland               | 4                                    | 322                           | 16          | CB, UC                 | NYHA II - III   | Not reported  |
| Myers 2001 <sup>76</sup>       | Switzerland               | 8                                    | 8                             | 24          | CB, UC                 | NYHA II - III   | Not reported  |
| Myers 2007 <sup>108</sup>      | Switzerland               | 8                                    | 8                             | 24          | CB, UC                 | NYHA II - III   | Not reported  |
| Myers 2012 <sup>73</sup>       | Switzerland               | 8                                    | 8                             | 50          | CB, UC                 | NYHA II - III   | Not reported  |
| Nilsson 2008 <sup>78</sup>     | Norway                    | 16                                   | 16                            | 80          | CB, UC                 | NYHA II - III   | Not reported  |
| Nilsson 2010 <sup>109</sup>    | Norway                    | 16                                   | 16                            | 78          | CB, UC                 | NYHA II - III   | Not reported  |
| Nolte 2015 <sup>110</sup>      | Germany                   | 12                                   | 12                            | 64          | CB, UC                 | NYHA II - III   | HFpEF         |
| Norman 2020 <sup>151</sup>     | USA                       | 76                                   | 78                            | 204         | CB, UC                 | NYHA I - IV     | Not reported  |
| O'Connor 2009 <sup>158</sup>   | USA, Canada & France      | 12                                   | 208                           | 2,331       | CB, UC                 | NYHA I - IV     | Not reported  |
| Oka 2000 <sup>111</sup>        | USA                       | 12                                   | 12                            | 40          | HB, UC                 | NYHA II - III   | Not reported  |
| Passino 2006 <sup>112</sup>    | Italy                     | 36                                   | 39                            | 85          | HB, UC                 | NYHA I - III    | Not reported  |
| Passino 2008 <sup>58</sup>     | Italy                     | 36                                   | 39                            | 90          | HB, UC                 | NYHA I - III    | Not reported  |
| Patwala 2009 <sup>113</sup>    | UK                        | 12                                   | 12                            | 50          | CB, UC                 | NYHA II - IV    | Not reported  |
| Peng 2018 <sup>84</sup>        | China                     | 8                                    | 16                            | 98          | TE, UC                 | NYHA I - III    | Not reported  |
| Piotrowicz 2010 <sup>153</sup> | Poland                    | 8                                    | 8                             | 131         | CB, TE                 | NYHA II - III   | Not reported  |
| Piotrowicz 2015 <sup>33</sup>  | Poland                    | 8                                    | 8                             | 107         | TE, UC                 | NYHA II - III   | Not reported  |

| Study                              | Country of study | Exercise program<br>duration (weeks) | Follow-up<br>duration (weeks) | Sample size | ExCR delivery<br>modes | NYHA class      | HF type       |
|------------------------------------|------------------|--------------------------------------|-------------------------------|-------------|------------------------|-----------------|---------------|
| Piotrowicz 2015b <sup>166</sup>    | Poland           | 8                                    | 8                             | 131         | CB, TE                 | NYHA II - III   | Not reported  |
| Piotrowicz 2016 <sup>139</sup>     | Poland           | 8                                    | 8                             | 69          | TE, UC                 | NYHA II - III   | Not reported  |
| Piotrowicz 2020 <sup>163</sup>     | Poland           | 9                                    | 104                           | 850         | TE, UC                 | NYHA I - III    | Not reported  |
| Pourhabib 2018 <sup>59</sup>       | Iran             | 12                                   | 12                            | 53          | CB, UC                 | NYHA II - III   | Not reported  |
| Pozehl 2010 <sup>32</sup>          | USA              | 12                                   | 12                            | 42          | CB, UC                 | NYHA II - III   | Not reported  |
| Pullen 2008 <sup>114</sup>         | USA              | 8                                    | 8                             | 19          | HY, UC                 | NYHA I - III    | Not reported  |
| Pullen 2010 <sup>29</sup>          | USA              | 8                                    | 8                             | 40          | CB, UC                 | NYHA I - III    | Not reported  |
| Quittan 1999 <sup>54</sup>         | Austria          | 12                                   | 12                            | 25          | CB, UC                 | NYHA I - III    | Not reported  |
| Redwine 2019 <sup>115</sup>        | USA              | 16                                   | 16                            | 70          | CB, UC                 | Not<br>reported | HFpEF & HFrEF |
| Reeves 2017 <sup>156</sup>         | USA              | 12                                   | 26                            | 27          | CB, UC                 | Not<br>reported | Not reported  |
| Ricca-Mallada 2017 <sup>51</sup>   | Uruguay          | 24                                   | 24                            | 34          | CB, UC                 | NYHA I - III    | Not reported  |
| Roveda 2003 <sup>55</sup>          | Brazil           | 16                                   | 16                            | 16          | CB, UC                 | NYHA II - III   | Not reported  |
| Sabelis 2004a <sup>116</sup>       | Netherlands      | 26                                   | 26                            | 29          | HY, UC                 | NYHA II - III   | Not reported  |
| Sabelis 2004b <sup>117</sup>       | Netherlands      | 26                                   | 26                            | 61          | HY, UC                 | NYHA II - III   | Not reported  |
| Sadek 2020 <sup>118</sup>          | Lebanon          | 12                                   | 12                            | 20          | CB, UC                 | NYHA II - III   | Not reported  |
| Safiyari-Hafizi 2016 <sup>50</sup> | Canada           | 12                                   | 12                            | 40          | HB, UC                 | NYHA I - III    | Not reported  |
| Santa-Clara 2019 <sup>80</sup>     | Portugal         | 24                                   | 26                            | 37          | CB, UC                 | NYHA II - IV    | Not reported  |
| Santos 2010 <sup>119</sup>         | Brazil           | 16                                   | 16                            | 23          | CB, UC                 | NYHA I - III    | Not reported  |

| Study                            | Country of study | Exercise program | Follow-up        | Sample size | ExCR delivery | NYHA class    | HF type      |
|----------------------------------|------------------|------------------|------------------|-------------|---------------|---------------|--------------|
|                                  |                  | duration (weeks) | duration (weeks) |             | modes         |               |              |
| Senden 2005 <sup>120</sup>       | Netherlands      | 26               | 26               | 61          | HY, UC        | NYHA II - III | Not reported |
| Servantes 2012 <sup>121</sup>    | Brazil           | 12               | 12               | 45          | HB, UC        | NYHA II - III | Not reported |
| Servantes 2018 <sup>48</sup>     | Brazil           | 12               | 12               | 37          | CB, UC        | NYHA II - III | Not reported |
| Shoemaker 2017 <sup>86</sup>     | USA              | 12               | 39               | 10          | HB, UC        | NYHA II - III | Not reported |
| Silva 2002 <sup>164</sup>        | Brazil           | 12               | 12               | 24          | CB, UC        | NYHA I - III  | Not reported |
| Smart 2012 <sup>49</sup>         | Australia        | 16               | 16               | 25          | CB, UC        | NYHA I - II   | HFpEF        |
| Smolis-Bak 2015 <sup>61</sup>    | Poland           | 12               | 52               | 52          | TE, UC        | NYHA III      | Not reported |
| Smolis-Bak 2017 <sup>46</sup>    | Poland           | 24               | 78               | 84          | CB, UC        | NYHA III      | Not reported |
| Spee 2016 <sup>143</sup>         | Netherlands      | 12               | 12               | 26          | CB, UC        | NYHA I - III  | Not reported |
| Spee 2020 <sup>122</sup>         | Netherlands      | 12               | 12               | 24          | CB, UC        | NYHA II - III | Not reported |
| Sturm 1999 <sup>148</sup>        | Austria          | 12               | 12               | 26          | CB, UC        | NYHA II - III | Not reported |
| Tyni-Lenne 1996 <sup>52</sup>    | Sweden           | 12               | 8                | 21          | CB, UC        | NYHA II - III | Not reported |
| Tyni-Lenne 2001 <sup>83</sup>    | Sweden           | 8                | 8                | 24          | CB, UC        | NYHA II - III | Not reported |
| Vordos 2017 <sup>77</sup>        | Greek            | 12               | 12               | 33          | CB, UC        | NYHA I - II   | Not reported |
| Wielenga 1999 <sup>72</sup>      | Netherlands      | 12               | 12               | 67          | CB, UC        | NYHA II - III | Not reported |
| Willenheimer 1998 <sup>160</sup> | Sweden           | 16               | 16               | 49          | CB, UC        | NYHA I - III  | Not reported |
| Willenheimer 2001 <sup>123</sup> | Sweden           | 16               | 43               | 37          | CB, UC        | NYHA I - IV   | Not reported |
| Williams 2007 <sup>124</sup>     | Australia        | 12               | 12               | 13          | CB, UC        | NYHA II - III | Not reported |
| Witham 2005 <sup>126</sup>       | UK               | 24               | 26               | 82          | HY, UC        | NYHA II - III | Not reported |
| Witham 2007 <sup>125</sup>       | UK               | 24               | 82               | 82          | HY, UC        | NYHA II - III | Not reported |



| Study                       | Country of study     | Exercise program<br>duration (weeks) | Follow-up<br>duration (weeks) | Sample size | ExCR delivery<br>modes | NYHA class    | HF type      |
|-----------------------------|----------------------|--------------------------------------|-------------------------------|-------------|------------------------|---------------|--------------|
| Xueyu 2017 <sup>127</sup>   | China                | 12                                   | 12                            | 78          | HB, UC                 | NYHA II - III | Not reported |
| Yeh 2004 <sup>45</sup>      | USA                  | 12                                   | 12                            | 30          | CB, UC                 | NYHA I - IV   | Not reported |
| Yeh 2008 <sup>64</sup>      | USA                  | 12                                   | 12                            | 30          | HY, UC                 | NYHA I - IV   | Not reported |
| Yeh 2011 <sup>149</sup>     | USA                  | 12                                   | 12                            | 100         | CB, UC                 | NYHA I - III  | Not reported |
| Zeitler 2015 <sup>129</sup> | USA, Canada & France | 12                                   | 208                           | 1,213       | CB, UC                 | NYHA II – IV  | Not reported |

CB – Centre-based ExCR, HB – Home-based ExCR, HY – Hybrid ExCR, TE – Technology-enabled ExCR and UC – Usual care

HFpEF – Heart Failure with preserved Ejection Fraction, and HFrEF – Heart Failure with reduced Ejection Fraction

NYHA – New York Heart Association Functional Classification

**Supplement 2 GRADE assessments**

| Comparison                | Within-study bias | Reporting bias | Indirectness  | Imprecision    | Heterogeneity  | Incoherence | Confidence rating |
|---------------------------|-------------------|----------------|---------------|----------------|----------------|-------------|-------------------|
| <b>6MWD</b>               |                   |                |               |                |                |             |                   |
| CB vs HB                  | Some concerns     | No concerns    | No concerns   | No concerns    | No concerns    | No concerns | High              |
| CB vs TE                  | Some concerns     | No concerns    | No concerns   | No concerns    | No concerns    | No concerns | High              |
| CB vs UC                  | Some concerns     | No concerns    | No concerns   | No concerns    | No concerns    | No concerns | High              |
| HB vs TE                  | Some concerns     | No concerns    | No concerns   | No concerns    | No concerns    | No concerns | High              |
| HB vs HY                  | Major concerns    | No concerns    | Some concerns | No concerns    | No concerns    | No concerns | Moderate          |
| HB vs UC                  | Some concerns     | No concerns    | No concerns   | No concerns    | Major concerns | No concerns | Moderate          |
| HY vs UC                  | Major concerns    | Some concerns  | Some concerns | No concerns    | No concerns    | No concerns | Moderate          |
| TE vs UC                  | Major concerns    | Some concerns  | No concerns   | Some concerns  | No concerns    | No concerns | Moderate          |
| CB vs HY                  | Major concerns    | Some concerns  | No concerns   | Some concerns  | No concerns    | No concerns | Moderate          |
| HY vs TE                  | Major concerns    | Some concerns  | No concerns   | Some concerns  | No concerns    | No concerns | Moderate          |
| <b>ISWD</b>               |                   |                |               |                |                |             |                   |
| HB vs UC                  | Some concerns     | No concerns    | No concerns   | No concerns    | Major concerns | No concerns | Moderate          |
| CB vs UC                  | Major concerns    | Some concerns  | No concerns   | Major concerns | No concerns    | No concerns | Low               |
| CB vs HB                  | Major concerns    | Some concerns  | No concerns   | Major concerns | No concerns    | No concerns | Low               |
| <b>VO<sub>2</sub>peak</b> |                   |                |               |                |                |             |                   |
| CB vs UC                  | Some concerns     | No concerns    | Some concerns | No concerns    | No concerns    | No concerns | High              |
| CB vs HY                  | Some concerns     | No concerns    | Some concerns | No concerns    | No concerns    | No concerns | High              |
| CB vs HB                  | Major concerns    | No concerns    | Some concerns | Some concerns  | No concerns    | No concerns | Moderate          |
| CB vs TE                  | Major concerns    | No concerns    | Some concerns | Some concerns  | No concerns    | No concerns | Moderate          |
| HB vs UC                  | Major concerns    | No concerns    | Some concerns | No concerns    | No concerns    | No concerns | Moderate          |

|              |                |               |               |                |                |             |          |
|--------------|----------------|---------------|---------------|----------------|----------------|-------------|----------|
| HY vs UC     | Major concerns | Some concerns | No concerns   | Some concerns  | No concerns    | No concerns | Moderate |
| HB vs TE     | Major concerns | No concerns   | Some concerns | Some concerns  | No concerns    | No concerns | Moderate |
| TE vs UC     | Major concerns | Some concerns | Some concerns | No concerns    | Major concerns | No concerns | Low      |
| HB vs HY     | Major concerns | Some concerns | Some concerns | Major concerns | No concerns    | No concerns | Low      |
| HY vs TE     | Major concerns | Some concerns | Some concerns | Major concerns | No concerns    | No concerns | Low      |
| <b>MLHFQ</b> |                |               |               |                |                |             |          |
| CB vs UC     | Some concerns  | No concerns   | No concerns   | No concerns    | No concerns    | No concerns | High     |
| HY vs UC     | Some concerns  | Some concerns | No concerns   | No concerns    | No concerns    | No concerns | High     |
| TE vs UC     | Some concerns  | No concerns   | No concerns   | Some concerns  | No concerns    | No concerns | High     |
| CB vs TE     | Some concerns  | No concerns   | Some concerns | Major concerns | No concerns    | No concerns | Moderate |
| CB vs HB     | Some concerns  | No concerns   | Some concerns | No concerns    | Major concerns | No concerns | Moderate |
| CB vs HY     | Some concerns  | Some concerns | No concerns   | Major concerns | No concerns    | No concerns | Moderate |
| HB vs HY     | Some concerns  | Some concerns | No concerns   | Major concerns | No concerns    | No concerns | Moderate |
| HB vs TE     | Some concerns  | Some concerns | No concerns   | Major concerns | No concerns    | No concerns | Moderate |
| HY vs TE     | Some concerns  | Some concerns | No concerns   | Major concerns | No concerns    | No concerns | Moderate |
| HB vs UC     | Major concerns | Some concerns | No concerns   | No concerns    | Major concerns | No concerns | Low      |
| <b>KCCQ</b>  |                |               |               |                |                |             |          |
| CB vs UC     | Some concerns  | No concerns   | No concerns   | Some concerns  | No concerns    | No concerns | High     |
| HB vs UC     | Major concerns | No concerns   | No concerns   | No concerns    | Some concerns  | No concerns | Moderate |
| TE vs UC     | Major concerns | No concerns   | Some concerns | No concerns    | Some concerns  | No concerns | Moderate |
| CB vs HB     | Some concerns  | No concerns   | Some concerns | No concerns    | Major concerns | No concerns | Moderate |
| CB vs TE     | Major concerns | Some concerns | Some concerns | Major concerns | No concerns    | No concerns | Low      |
| HB vs TE     | Major concerns | Some concerns | Some concerns | Major concerns | No concerns    | No concerns | Low      |

| SF-36 mental component     |                |             |               |                |                |             |          |
|----------------------------|----------------|-------------|---------------|----------------|----------------|-------------|----------|
| CB vs HB                   | Some concerns  | No concerns | No concerns   | No concerns    | No concerns    | No concerns | High     |
| CB vs TE                   | Major concerns | No concerns | No concerns   | No concerns    | No concerns    | No concerns | Moderate |
| CB vs UC                   | Some concerns  | No concerns | Some concerns | No concerns    | Major concerns | No concerns | Moderate |
| HB vs TE                   | Major concerns | No concerns | No concerns   | No concerns    | No concerns    | No concerns | Moderate |
| HB vs UC                   | Some concerns  | No concerns | Some concerns | No concerns    | No concerns    | No concerns | High     |
| TE vs UC                   | Major concerns | No concerns | No concerns   | No concerns    | No concerns    | No concerns | Moderate |
| SF-36 physical component   |                |             |               |                |                |             |          |
| CB vs HB                   | Some concerns  | No concerns | No concerns   | No concerns    | Some concerns  | No concerns | High     |
| CB vs TE                   | Major concerns | No concerns | Some concerns | No concerns    | No concerns    | No concerns | Moderate |
| CB vs UC                   | Some concerns  | No concerns | Some concerns | No concerns    | Major concerns | No concerns | Moderate |
| HB vs UC                   | Some concerns  | No concerns | No concerns   | No concerns    | No concerns    | No concerns | High     |
| HB vs TE                   | Some concerns  | No concerns | Some concerns | No concerns    | No concerns    | No concerns | High     |
| TE vs UC                   | Major concerns | No concerns | Some concerns | No concerns    | No concerns    | No concerns | Moderate |
| HF-related hospitalization |                |             |               |                |                |             |          |
| CB vs UC                   | Some concerns  | No concerns | No concerns   | No concerns    | Some concerns  | No concerns | High     |
| HB vs UC                   | Some concerns  | No concerns | No concerns   | No concerns    | Some concerns  | No concerns | High     |
| CB vs HB                   | Some concerns  | No concerns | No concerns   | No concerns    | Some concerns  | No concerns | High     |
| CB vs HY                   | Some concerns  | No concerns | No concerns   | Major concerns | No concerns    | No concerns | Moderate |
| CB vs TE                   | Major concerns | No concerns | No concerns   | Some concerns  | No concerns    | No concerns | Moderate |
| HB vs TE                   | Major concerns | No concerns | No concerns   | Some concerns  | No concerns    | No concerns | Moderate |
| HY vs TE                   | Major concerns | No concerns | No concerns   | Some concerns  | Some concerns  | No concerns | Moderate |
| HY vs UC                   | Major concerns | No concerns | Some concerns | Some concerns  | No concerns    | No concerns | Moderate |

|                             |                |               |               |                |                |               |          |
|-----------------------------|----------------|---------------|---------------|----------------|----------------|---------------|----------|
| HB vs HY                    | Major concerns | No concerns   | Some concerns | Major concerns | No concerns    | No concerns   | Low      |
| TE vs UC                    | Major concerns | No concerns   | Some concerns | No concerns    | Major concerns | Some concerns | Low      |
| <b>HF-related mortality</b> |                |               |               |                |                |               |          |
| CB vs UC                    | Major concerns | No concerns   | No concerns   | No concerns    | No concerns    | No concerns   | Moderate |
| HB vs UC                    | Some concerns  | No concerns   | No concerns   | Major concerns | No concerns    | No concerns   | Moderate |
| CB vs HB                    | Some concerns  | No concerns   | No concerns   | Major concerns | No concerns    | No concerns   | Moderate |
| HY vs UC                    | Major concerns | No concerns   | No concerns   | Major concerns | No concerns    | No concerns   | Low      |
| HB vs HY                    | Major concerns | Some concerns | No concerns   | Major concerns | No concerns    | No concerns   | Low      |
| CB vs HY                    | Major concerns | Some concerns | No concerns   | Major concerns | No concerns    | No concerns   | Low      |

CB – Centre-based ExCR, HB – Home-based ExCR, HY – Hybrid ExCR, TE – Technology-enabled ExCR and UC – Usual care

#### GRADE rating <sup>25</sup>:

**High** —high confidence the true effect is similar to the estimated effect

**Moderate** —the true effect is probably close to the estimated effect

**Low** —the true effect may be substantially different from the estimated effect

**Very low** —the true effect is likely to be substantially different from the estimated effect

#### Downgrading GRADE domains: No concerns, Some concerns, and Major concerns

##### 1) Within-study bias

In the GRADE assessment table, high risk of bias obtained from the risk of bias assessment was taken as “**Major concerns**”, some concerns as “**Some concerns**”, and low risk of bias as “**No concerns**”.

## 2) Reporting bias

The “Reporting bias” domain refers to biases that can occur due to publication bias. Judgement of reporting bias was based on asymmetry in funnel plot and Egger’s regression test.

- **No concerns:** No asymmetry in funnel plot and Egger’s test doesn’t indicate funnel plot asymmetry
- **Some concerns:** Asymmetry in funnel plot, but Egger’s test doesn’t indicate funnel plot asymmetry
- **Major concerns:** Asymmetry in funnel plot, and Egger’s test indicates funnel plot asymmetry

## 3) Indirectness

Indirectness is measured based on differences in population/intervention/outcome measurement that could modify treatment effect.

- **No concerns:** No difference in population or intervention or outcome measurement.
- **Some concerns:** If there is difference in one of the three characteristics (study populations, interventions, and outcome measurement)
- **Major concerns:** If there are two or more differences in any combination (study populations, interventions, and outcome measurement)

## 4) Imprecision

Imprecision is assessed by 95% confidence intervals which may include values that could lead to different clinical conclusions. The rules for judging imprecision are based on whether the confidence interval includes the line of no-effect and the clinically important values.

- **No concerns:** Confidence interval lies entirely between the two clinically important values or only include the clinically important value that favours the same intervention as the point estimate
- **Some concerns:** Confidence interval crosses the line of no-effect and extends into clinically important effect
- **Major concerns:** Confidence interval crosses the line of no-effect and extends into clinically important effects in **both** directions

## 5) Heterogeneity

Heterogeneity was judged based on confidence and prediction intervals in relation to the null effect and the clinically important effect on the opposite direction to the point estimate.

- **No concerns:** Confidence and prediction intervals **agree** in relation to clinically important effect
- **Some concerns:** Prediction interval **extends into clinically important or unimportant effects**
- **Major concerns:** Prediction interval extends into clinically important effects in **both** directions

## 6) Incoherence

Incoherence (the disagreement between direct and indirect evidence) was assessed based on three factors: similarity of point estimates, overlap of confidence intervals and statistical test comparing these two estimates. This was determined by the *p* value: if the *p* value is <0.05 then “**Major concerns**”, if between 0.05 and 0.10 then “**Some concerns**”, otherwise “**No concerns**”.

### Supplement 3 League table heatmaps of mean differences and/or odds ratios with 95% credible intervals

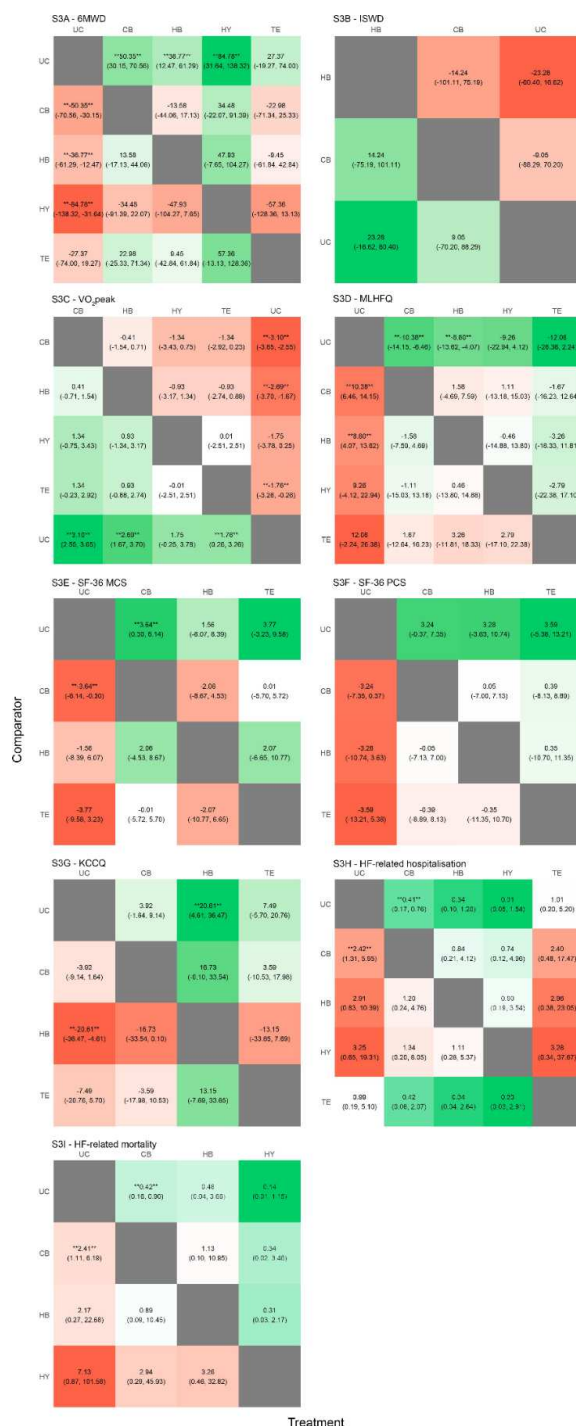

CB – Centre-based ExCR, HB – Home-based ExCR, HY – Hybrid ExCR, TE – Technology-enabled ExCR and UC – Usual care

Green: good effect, White: no effect, Red: bad effect, \*\*: statistically significant (P<0.05)

## Supplement 4 Cumulative ranking probability (SUCRA) plots

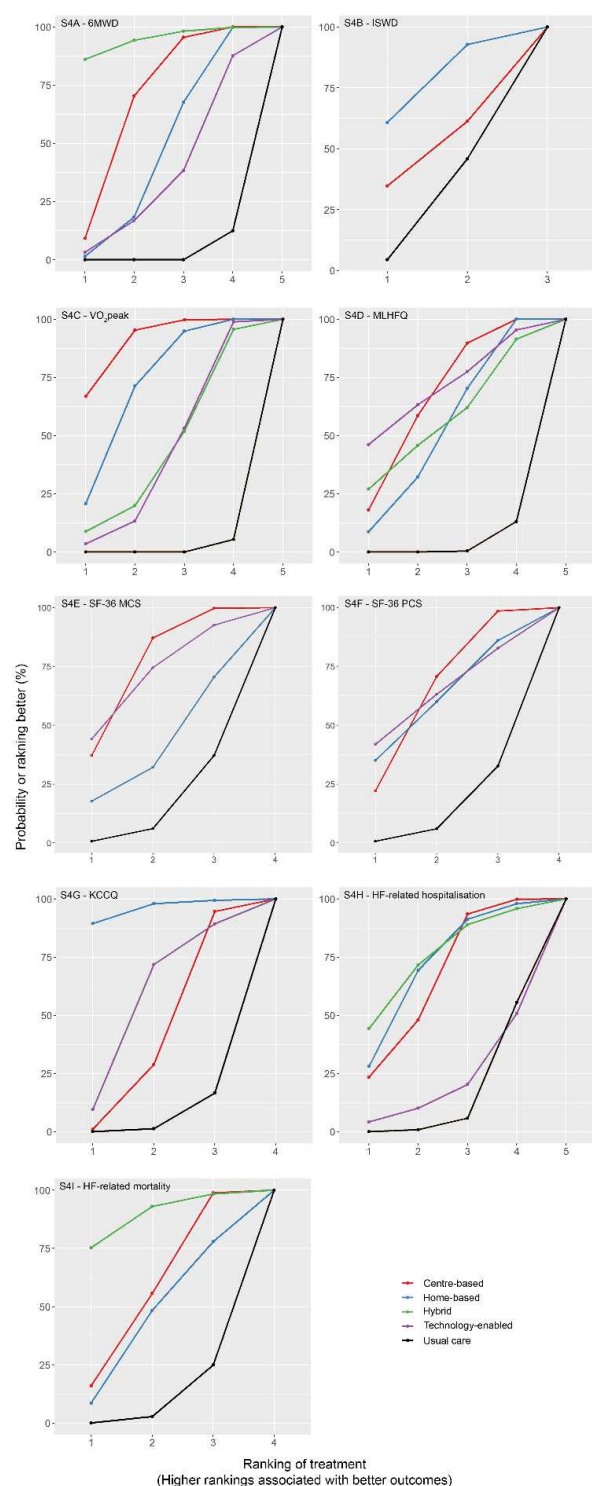

CB – Centre-based ExCR, HB – Home-based ExCR, HY – Hybrid ExCR, TE – Technology-enabled ExCR  
and UC – Usual care
